# Supplementary material
Source: PubMed Central journal article supplement (PMC5754234)

# Supplementary Fig. 1

Fig. 1a

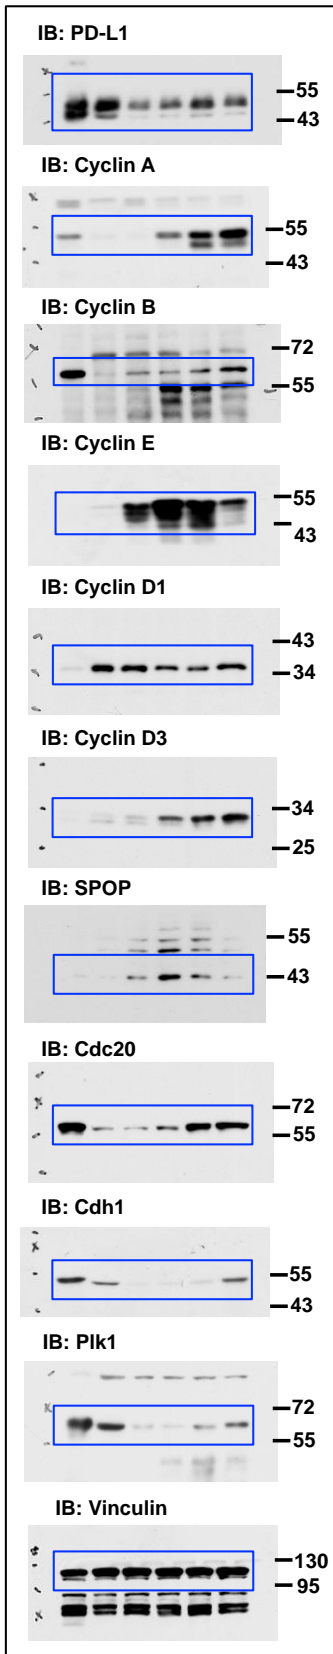

Fig. 1c

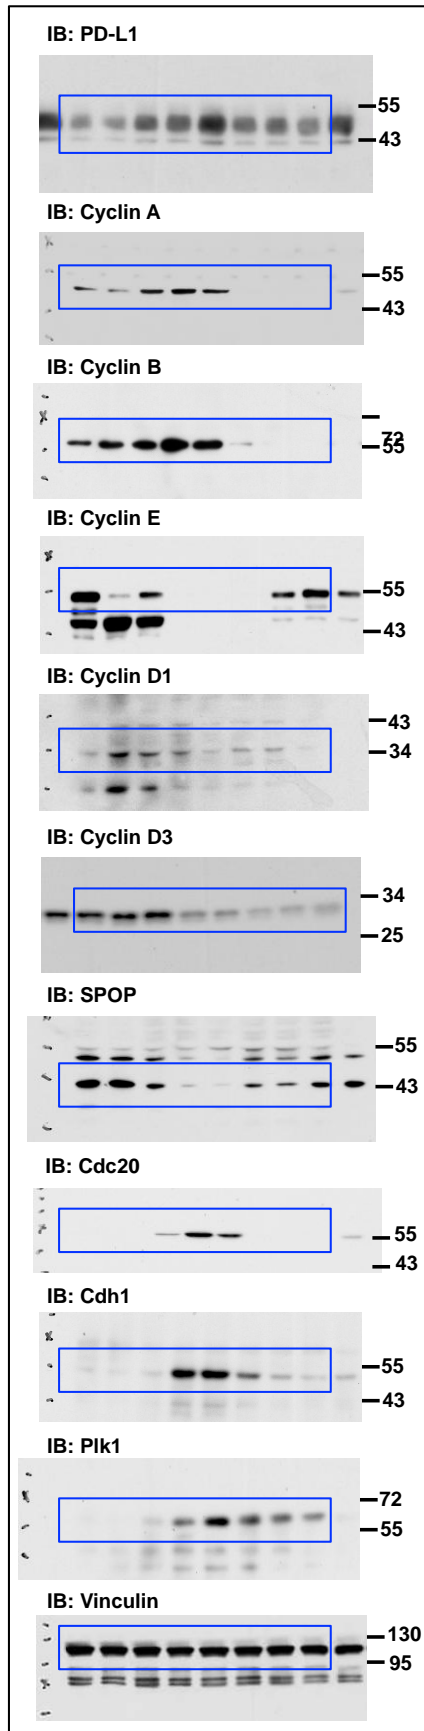

Fig. 2a

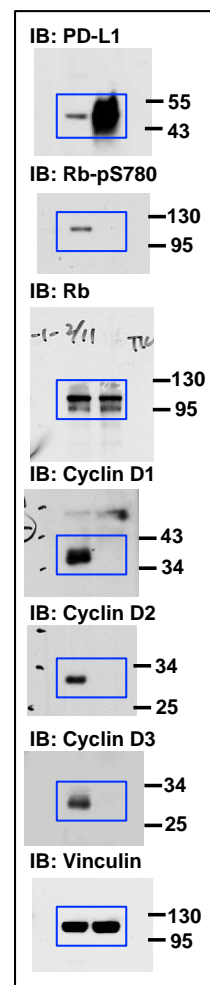

Fig. 2b

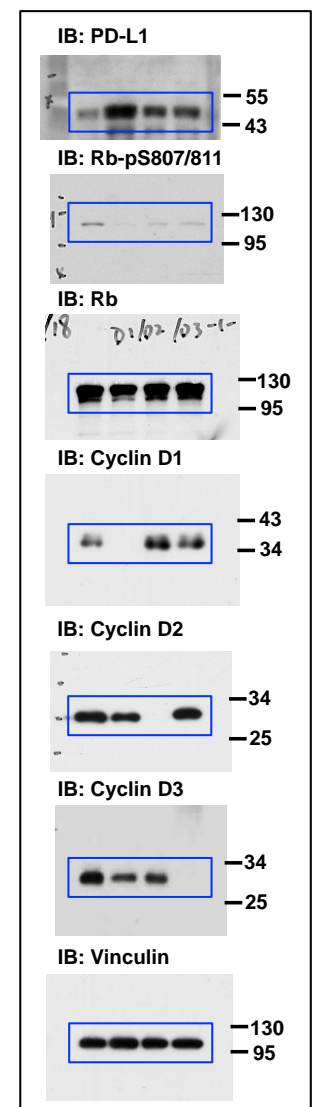

Fig. 2c

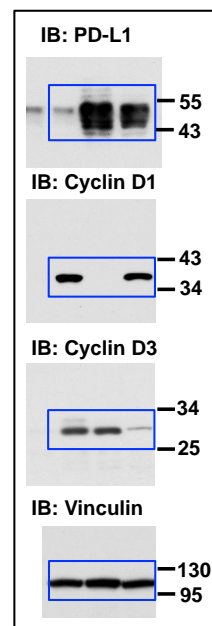

**Fig. 2d**

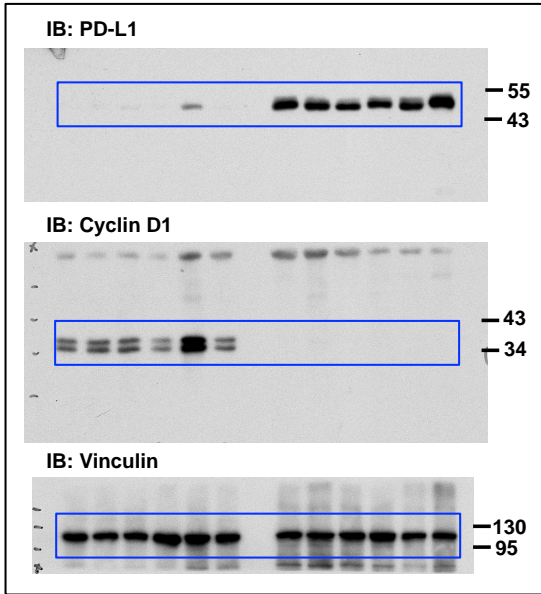

**Fig. 2e**

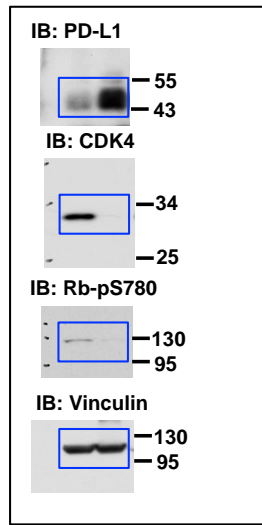

**Fig. 2f**

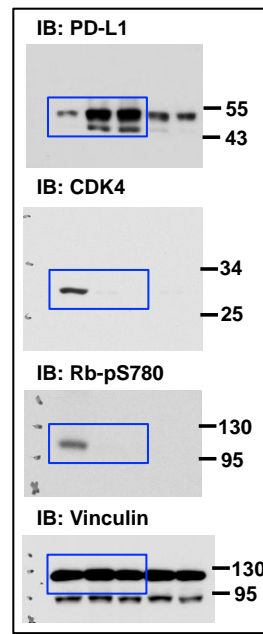

**Fig. 2g**

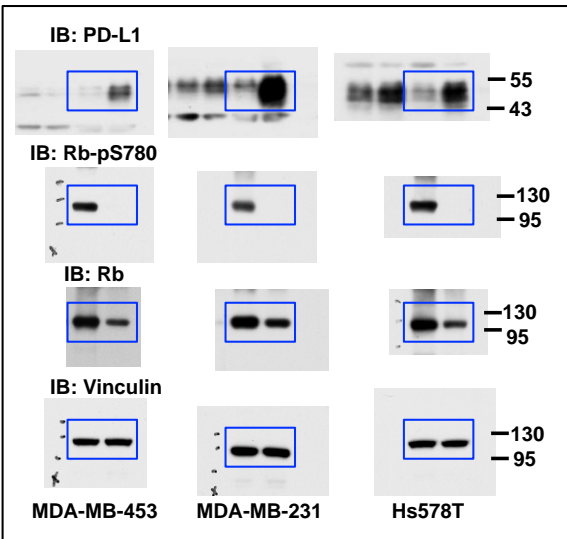

**Fig. 2h**

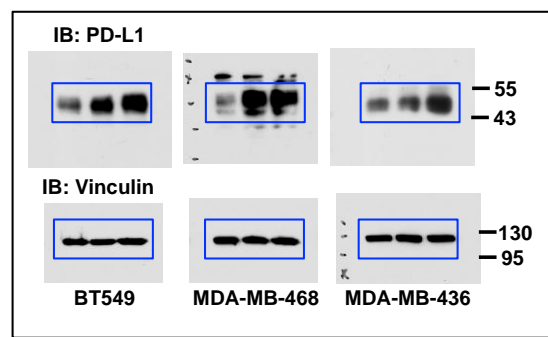

Fig. 3a

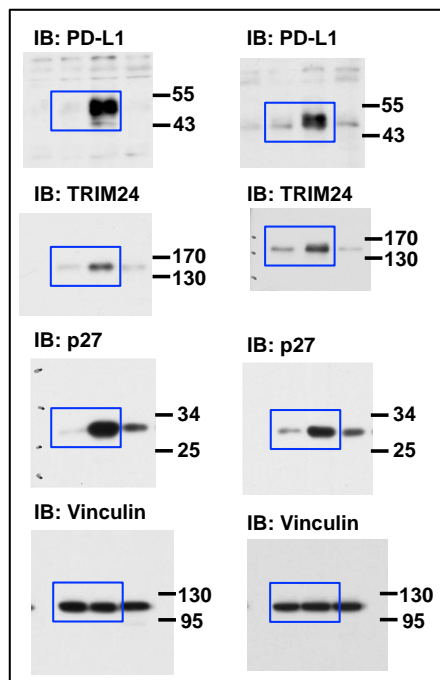

Fig. 3b

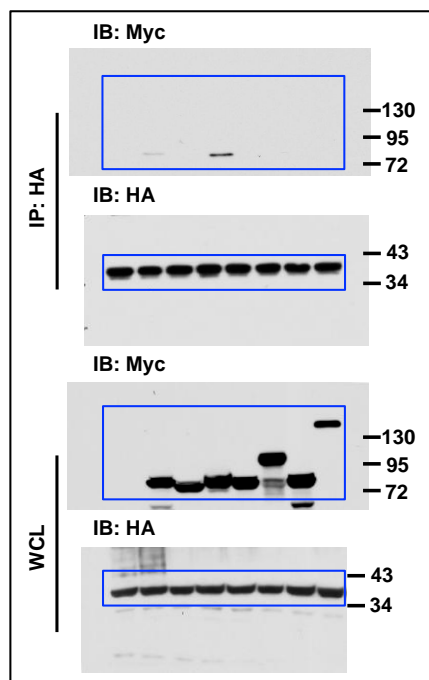

Fig. 3c

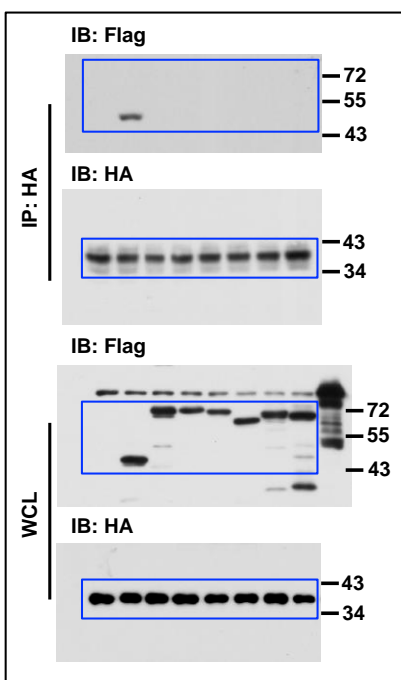

Fig. 3d

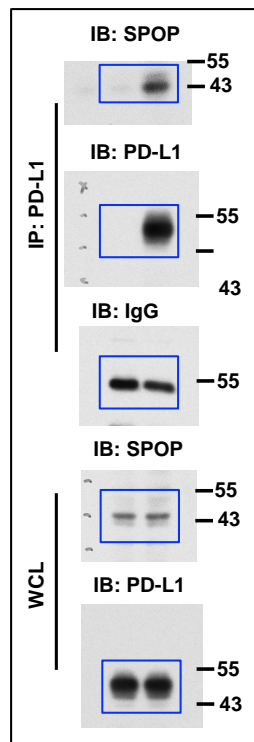

Fig. 3e

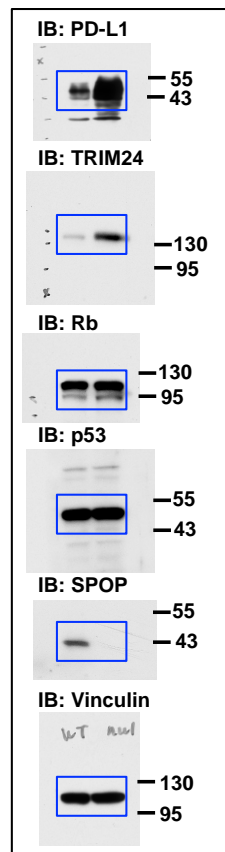

Fig. 3f

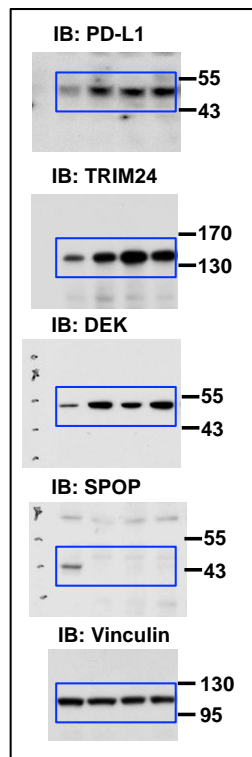

Fig. 3g

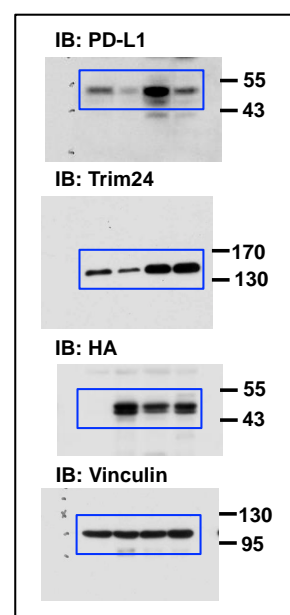

Fig. 3h

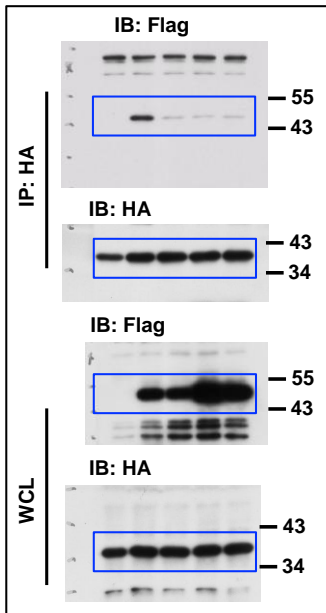

Fig. 3i

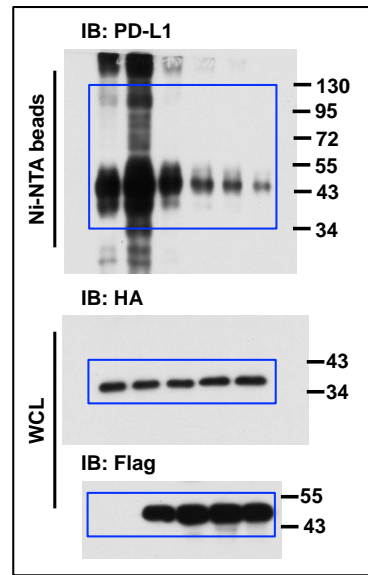

Fig. 4a

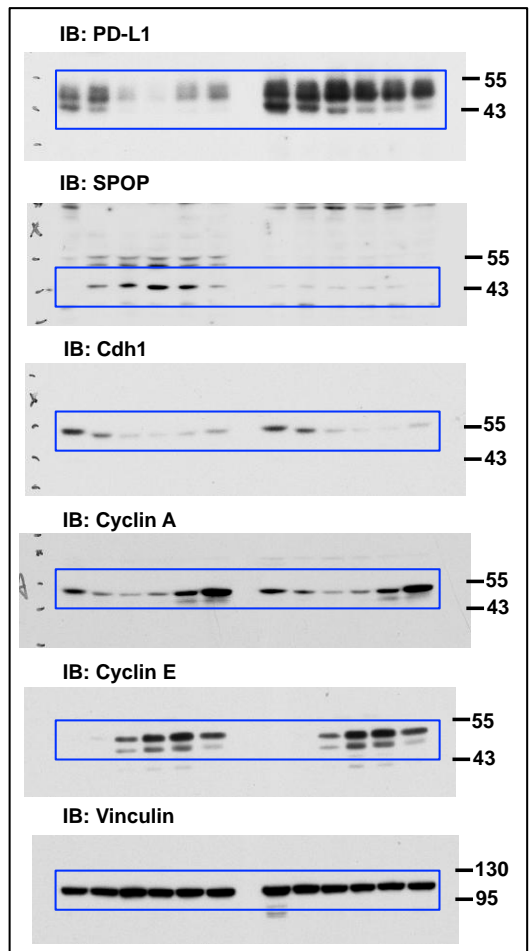

Fig. 4b

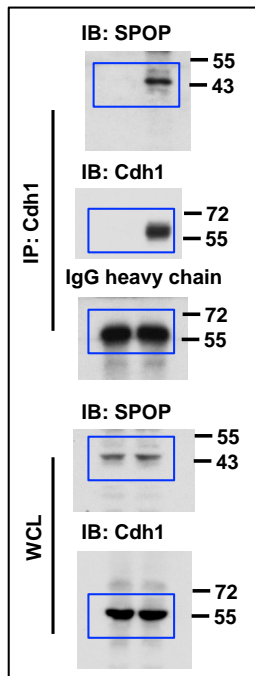

Fig. 4c

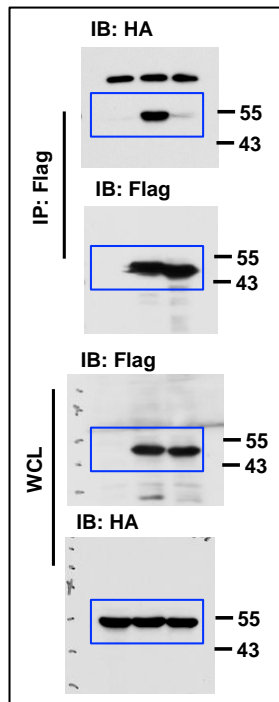

Fig. 4d

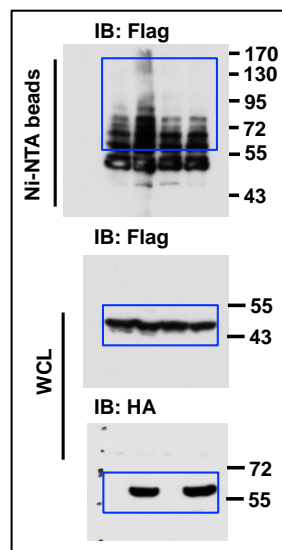

Fig. 4e

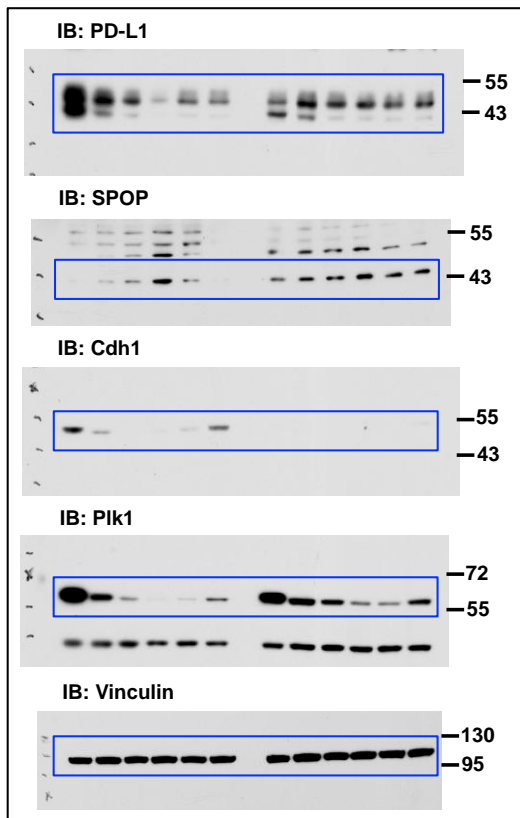

Fig. 4f

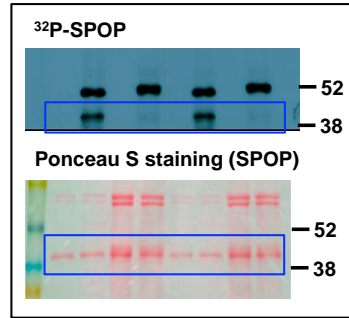

Fig. 4h

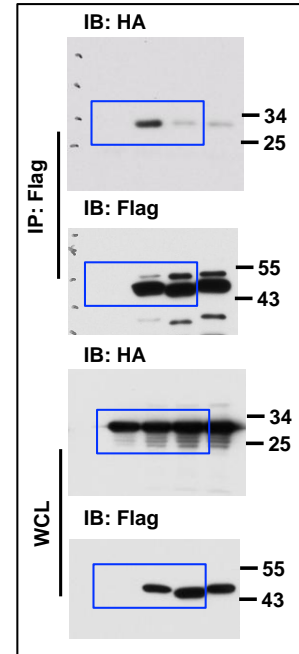

Fig. 4g

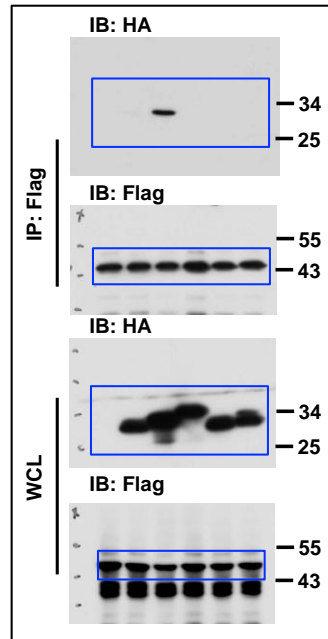

Fig. 4i

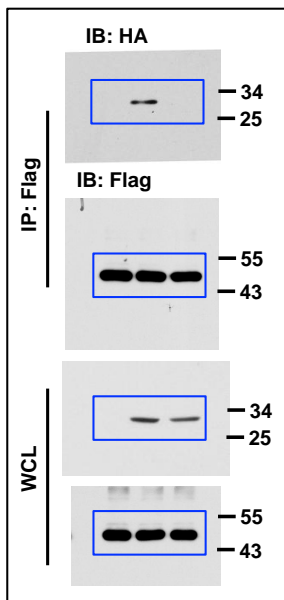

Fig. 4j

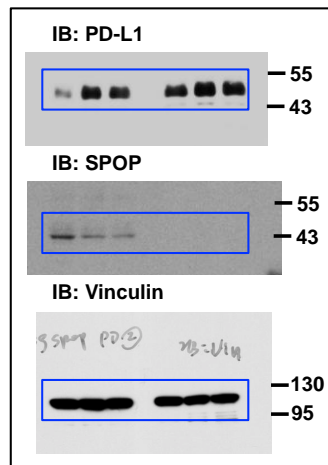

Extended Data Fig. 1a

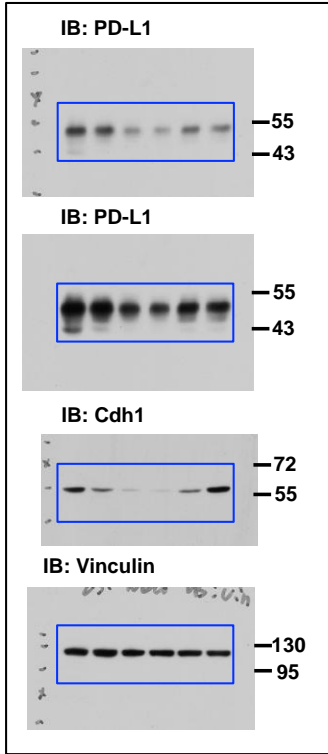

Extended Data Fig. 1b

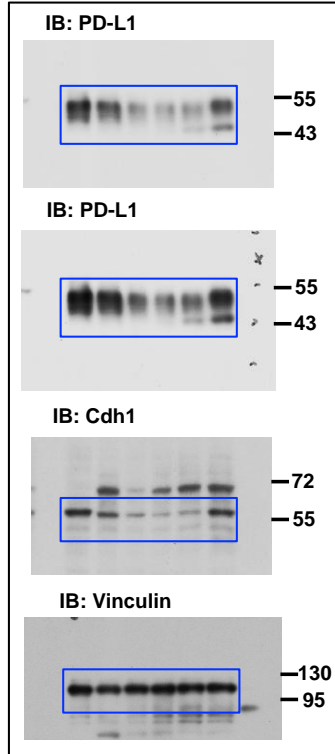

Extended Data Fig. 1e

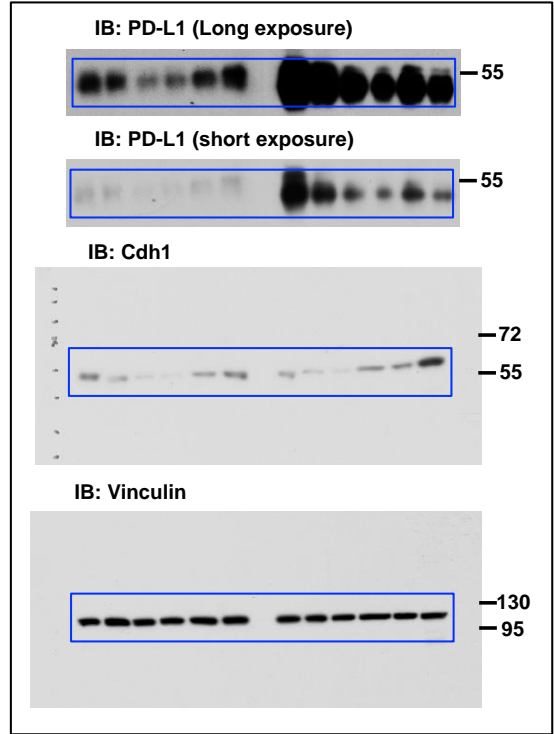

Extended Data Fig. 1f

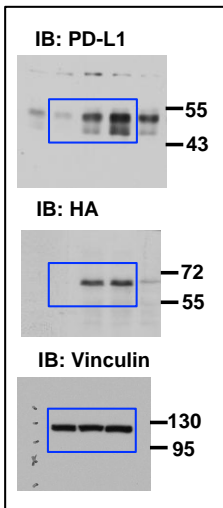

Extended Data Fig. 1g

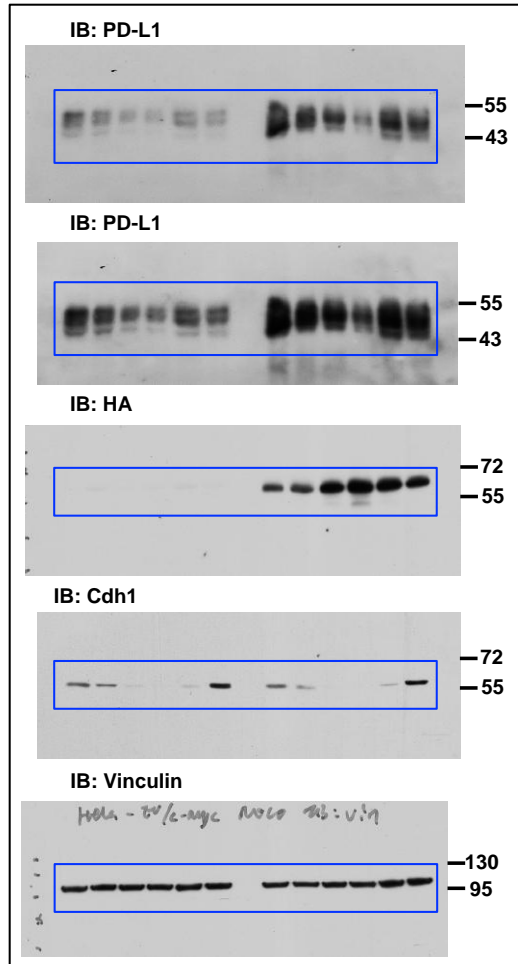

Extended Data Fig. 1h

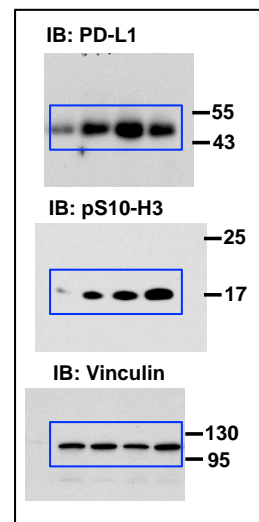

Extended Data Fig. 1i

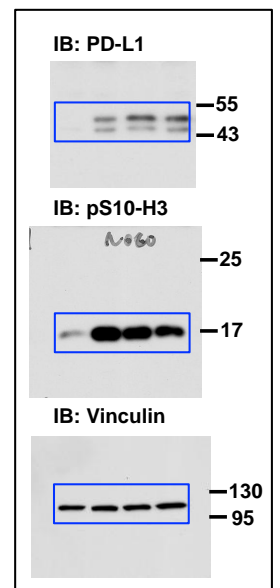

Extended Data Fig. 1j

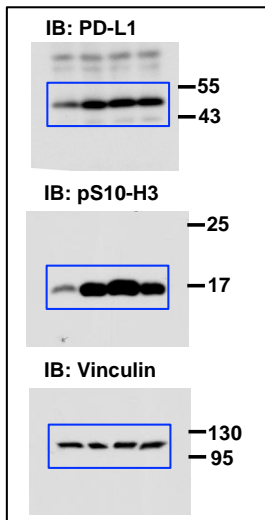

Extended Data Fig. 1k

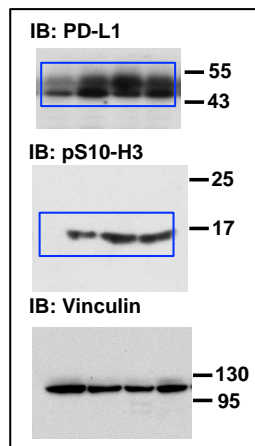

Extended Data Fig. 1l

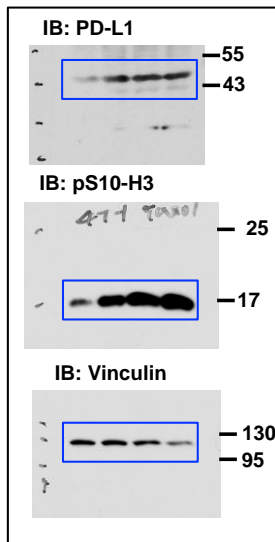

Extended Data Fig. 1m

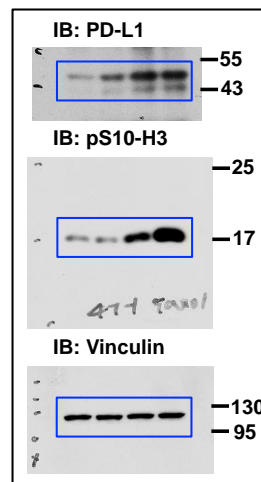

Extended Data Fig. 2a

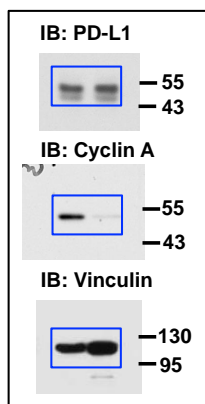

Extended Data Fig. 2b

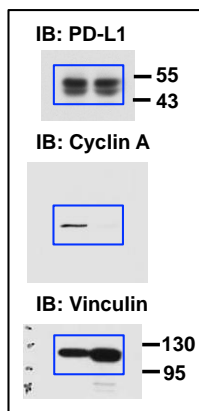

Extended Data Fig. 2c

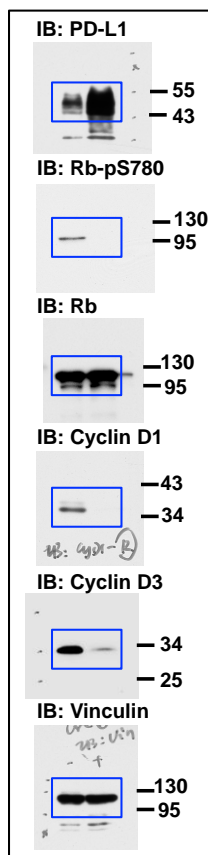

Extended Data Fig. 2f

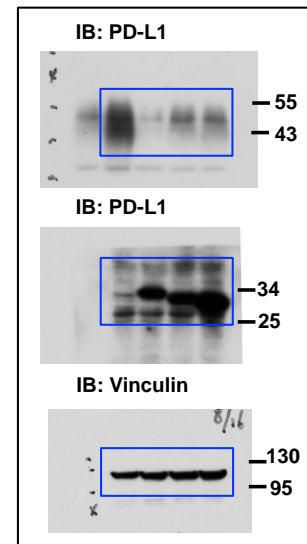

Extended Data Fig. 2g

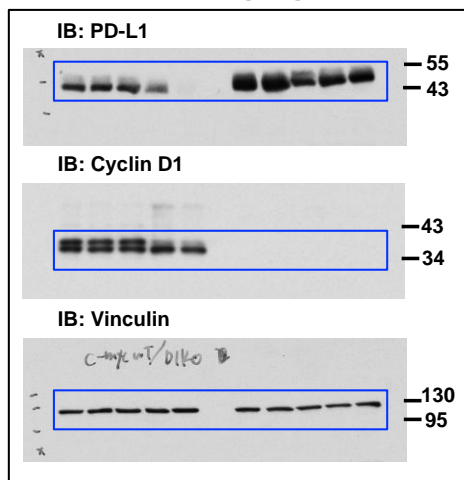

Extended Data Fig. 2h

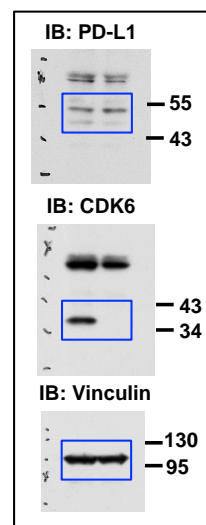

Extended Data Fig. 2i

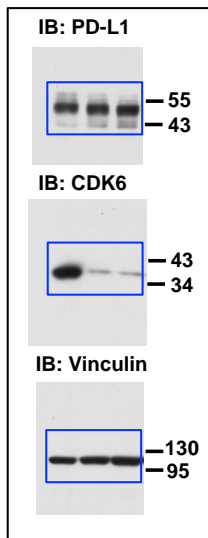

Extended Data Fig. 2j

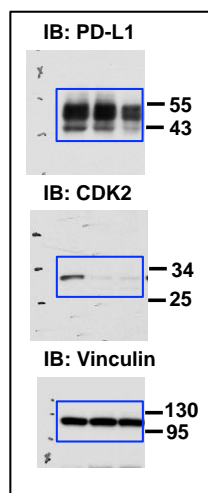

Extended Data Fig. 2k

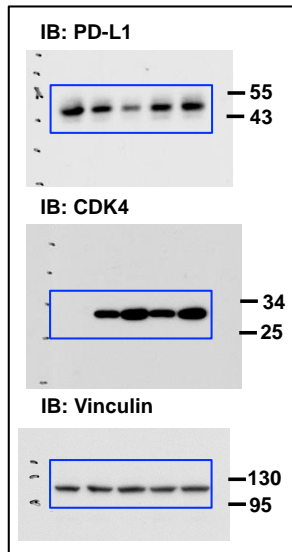

Extended Data Fig. 2m

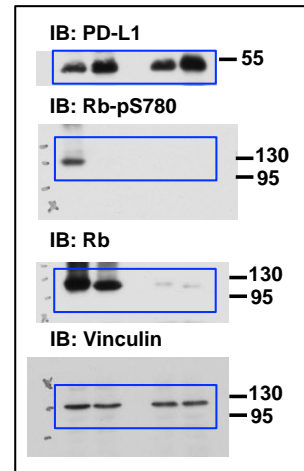

Extended Data Fig. 2n

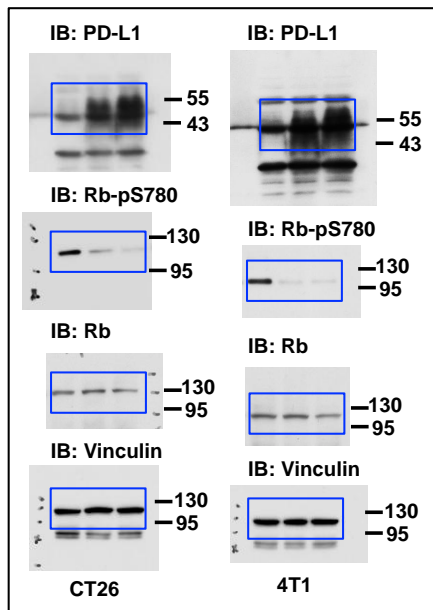

Extended Data Fig. 2o

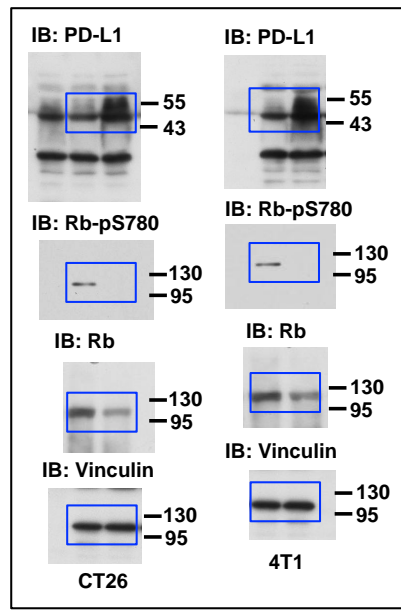

Extended Data Fig. 2p

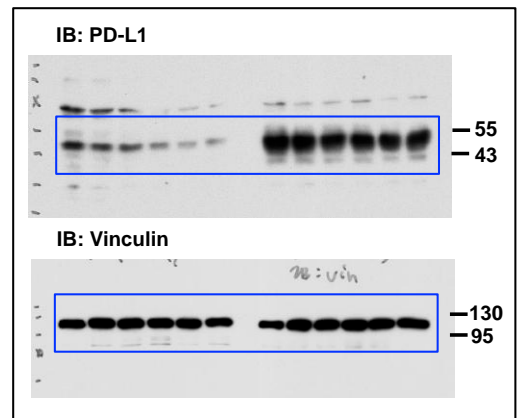



Extended Data Fig. 2r

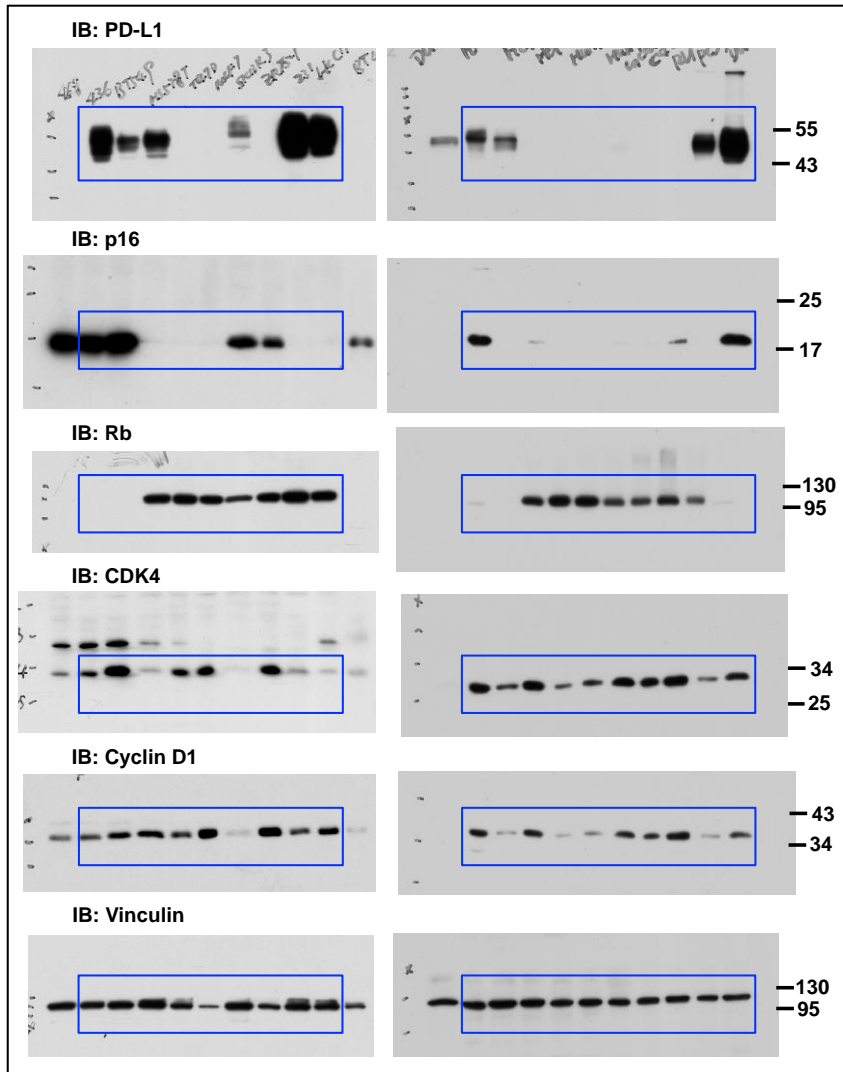

Extended Data Fig. 2s

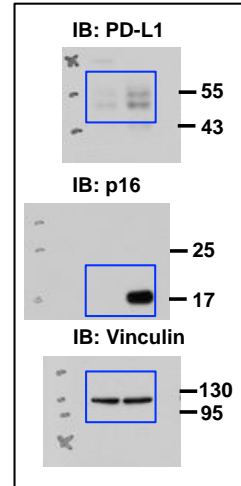

Extended Data Fig. 2t

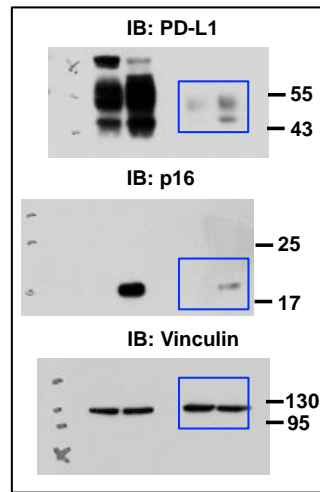

Extended Data Fig. 2u

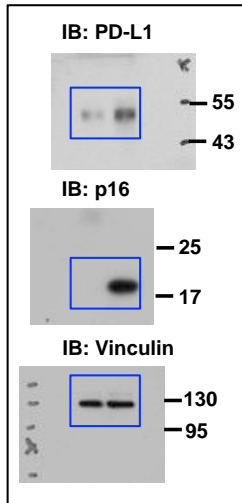

Extended Data Fig. 2v

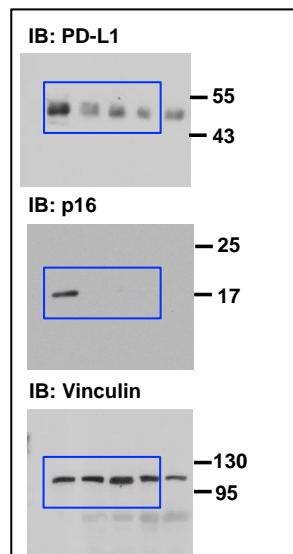

Extended Data Fig. 2w

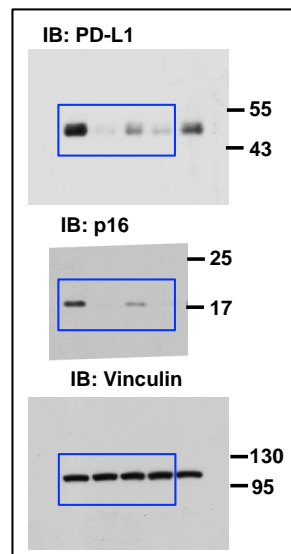

Extended Data Fig. 2x

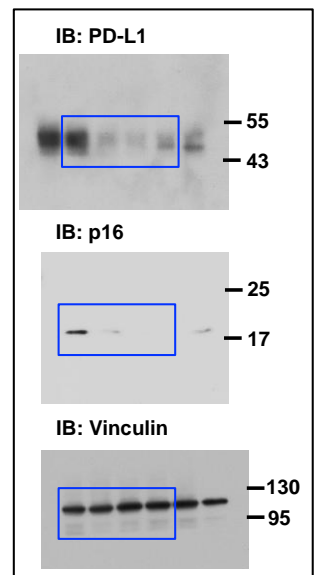

Extended Data Fig. 3a

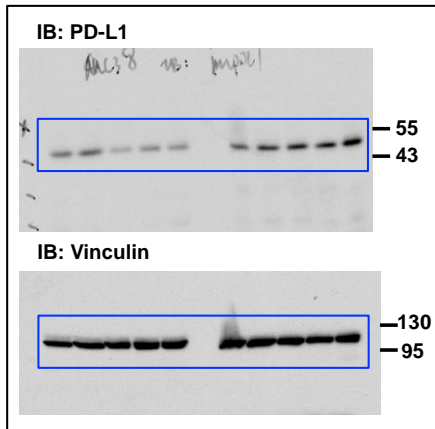

Extended Data Fig. 3b

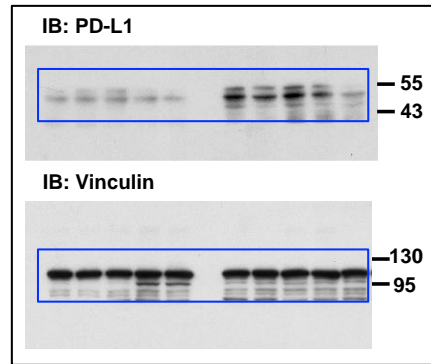

Extended Data Fig. 3h

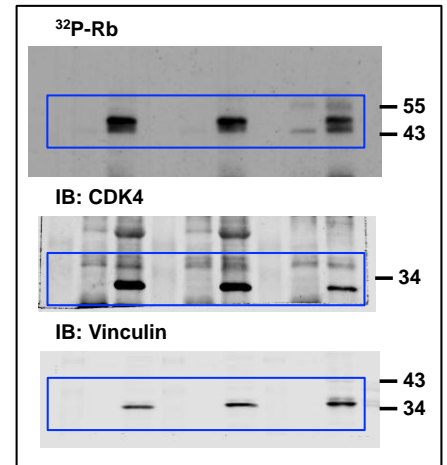

Extended Data Fig. 3f

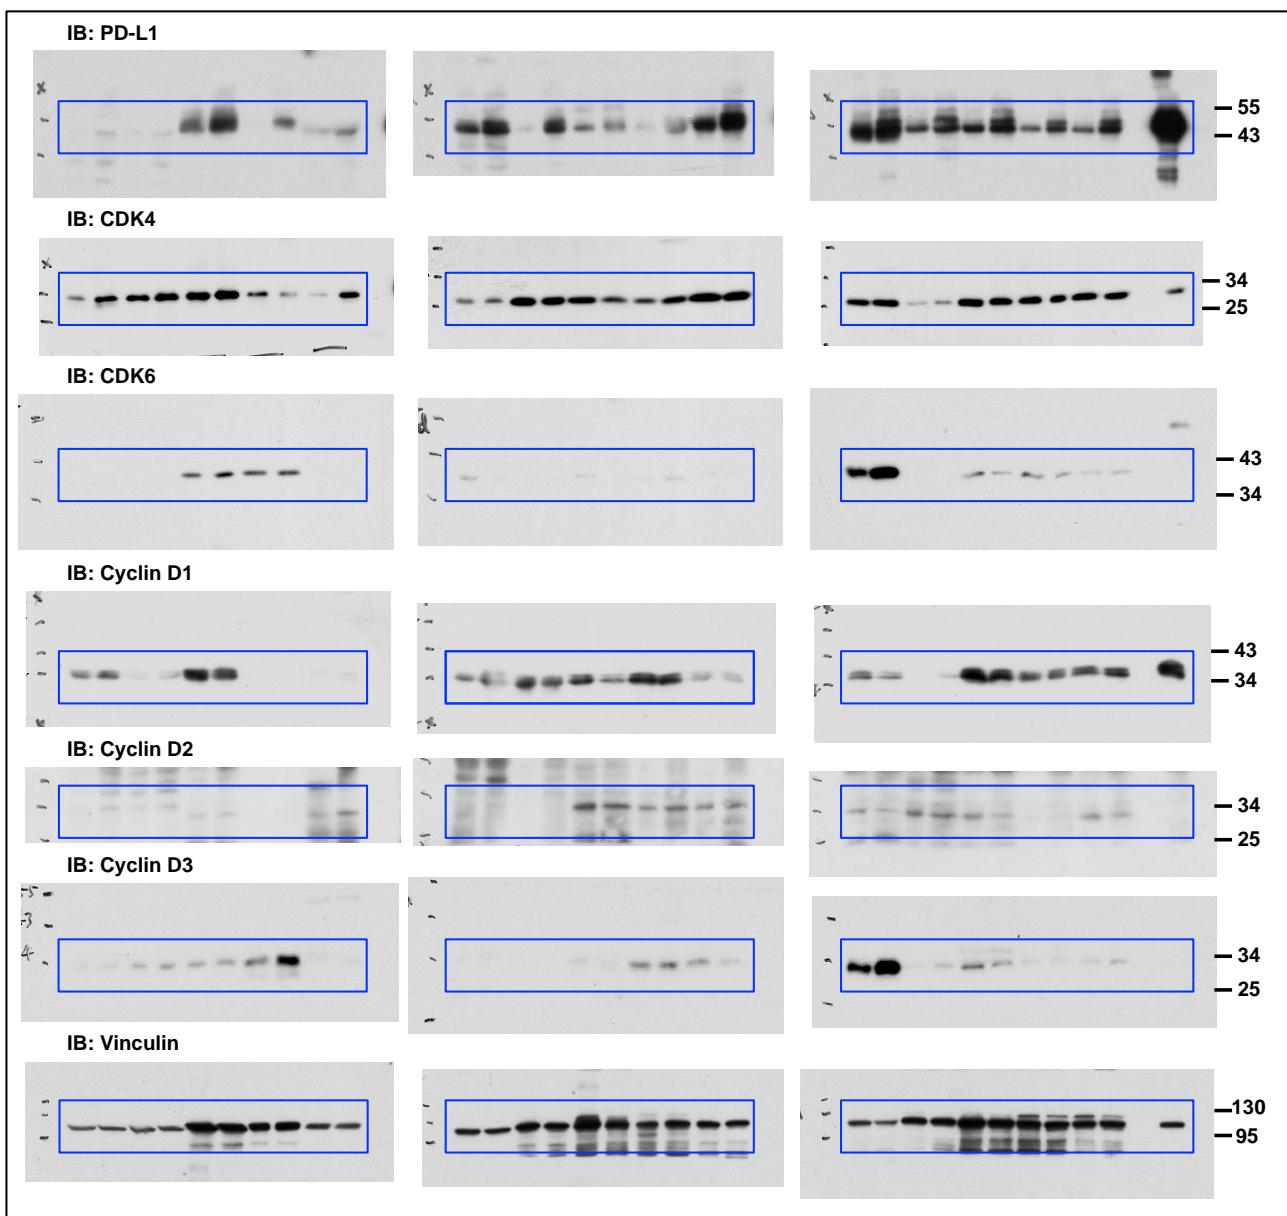

Extended Data Fig. 3d

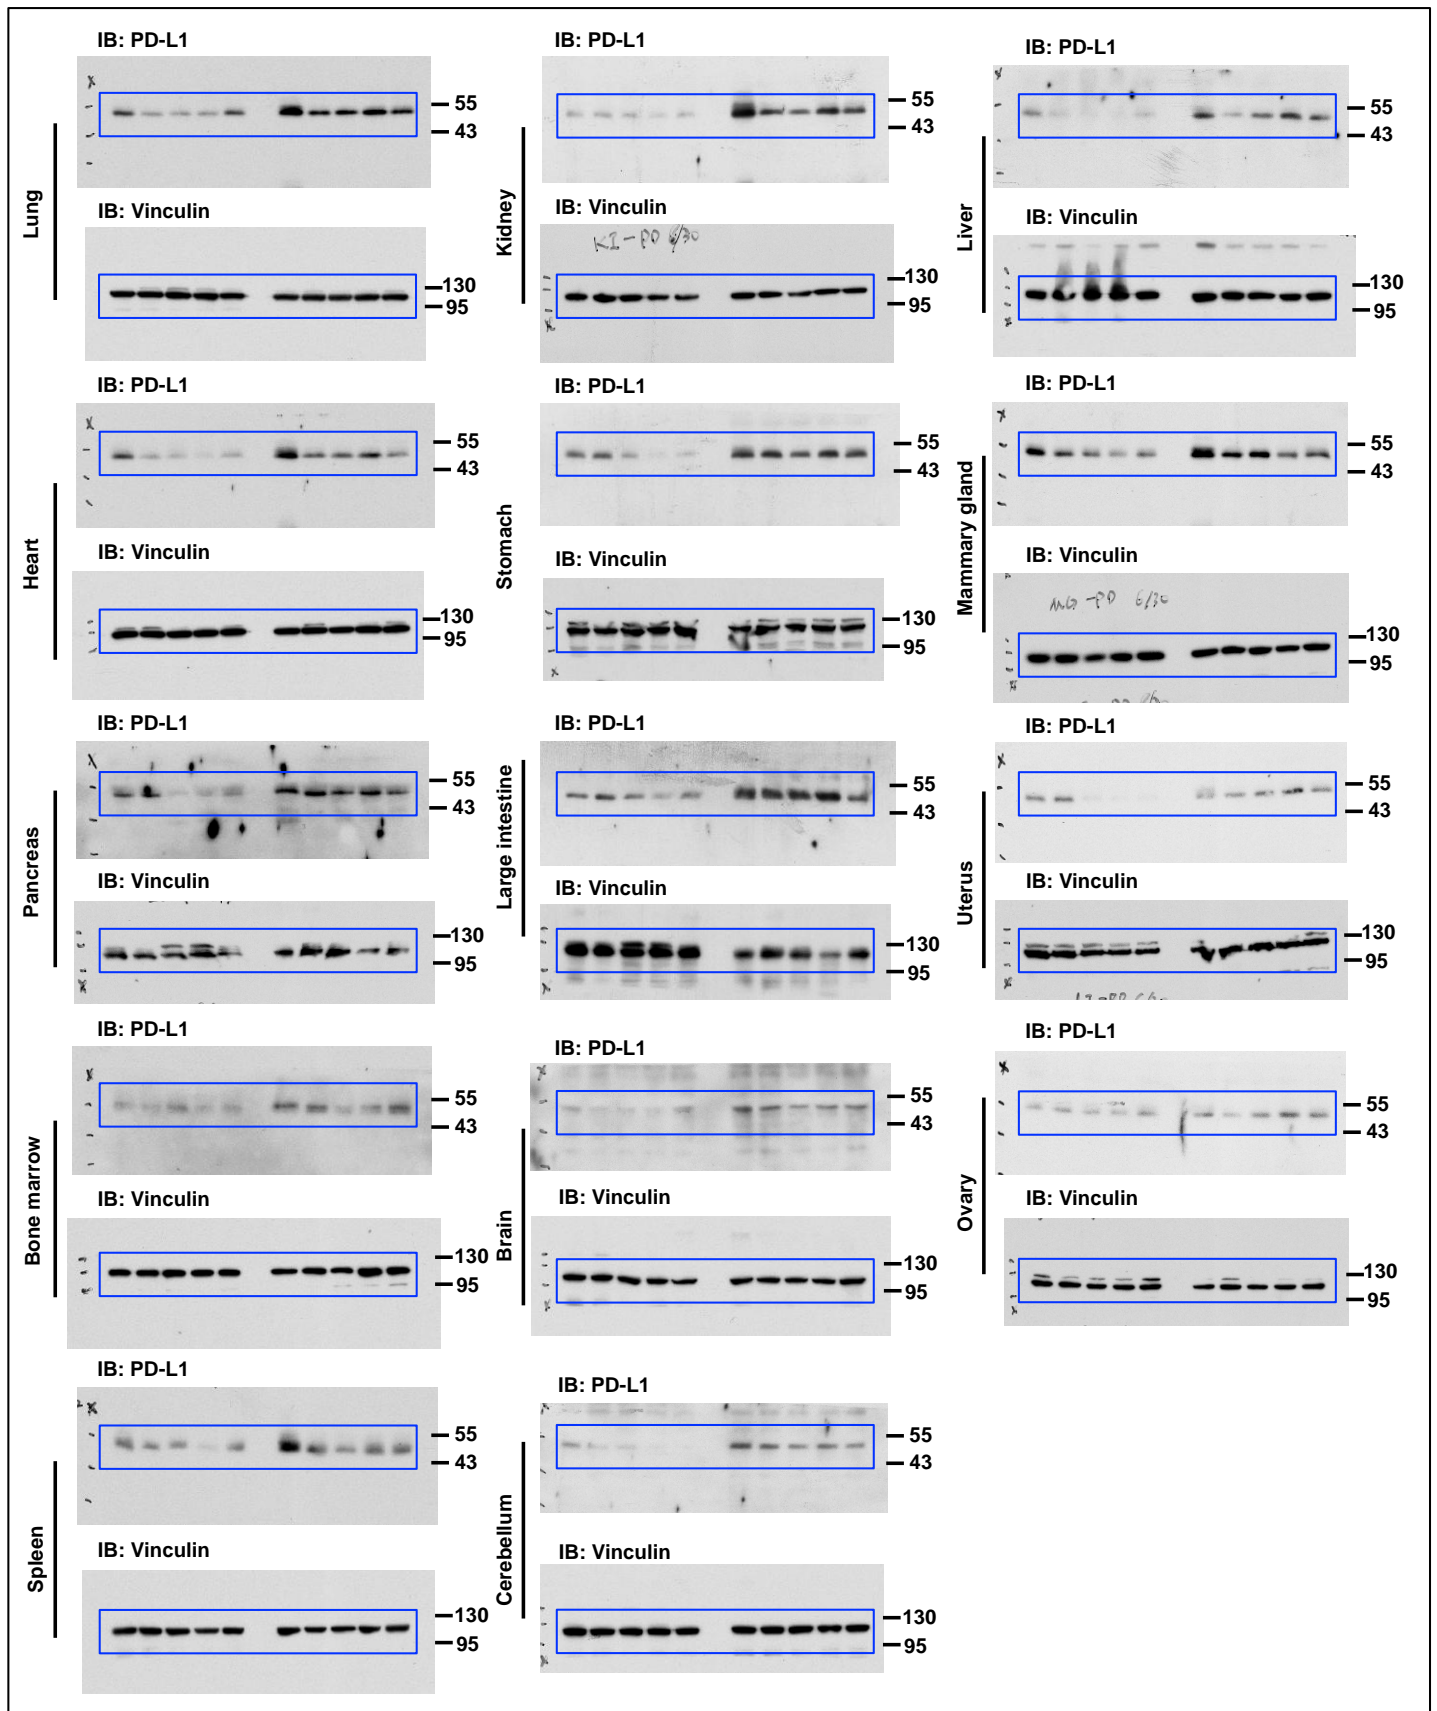

Extended Data Fig. 4b

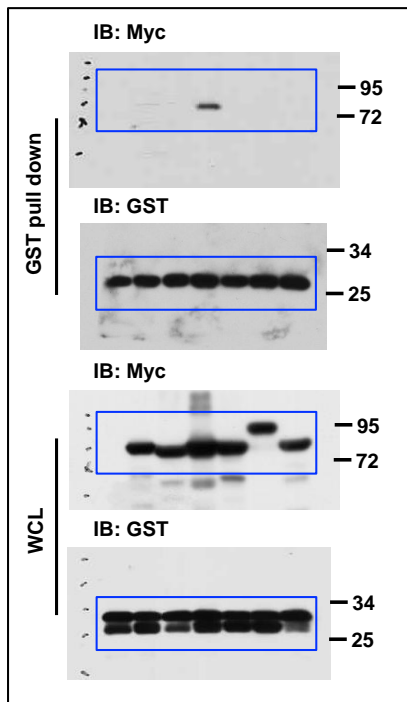

Extended Data Fig. 4c

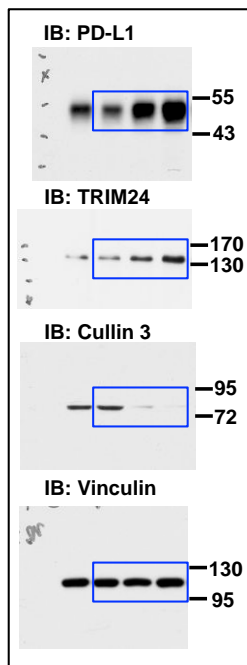

Extended Data Fig. 4d

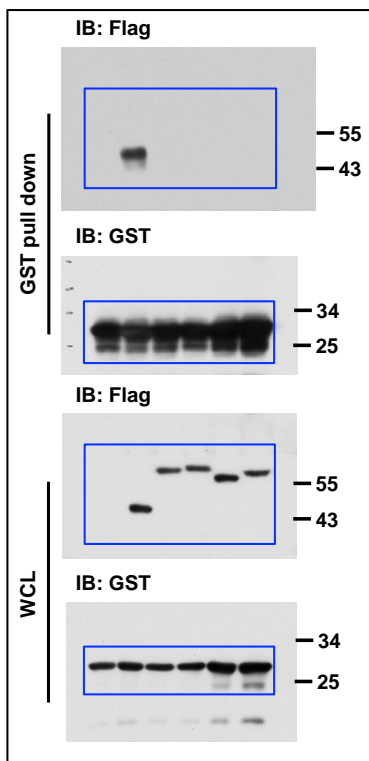

Extended Data Fig. 4e

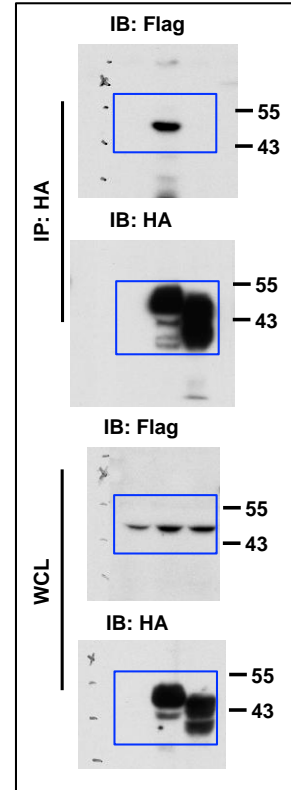

Extended Data Fig. 4f

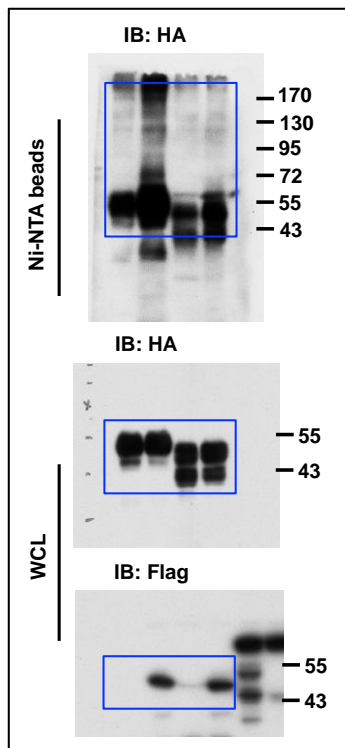

Extended Data Fig. 4g

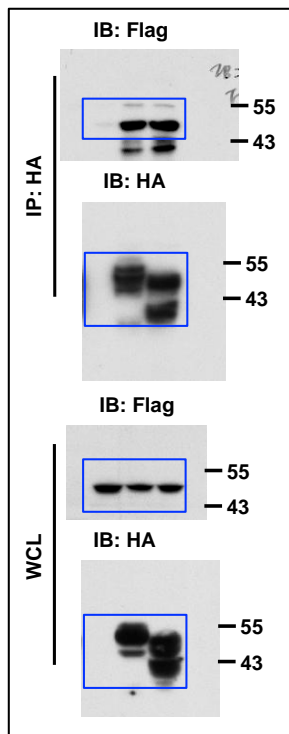

Extended Data Fig. 4h

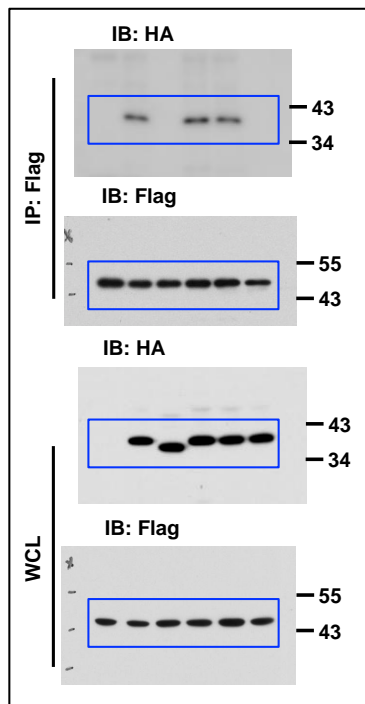

Extended Data Fig. 4i

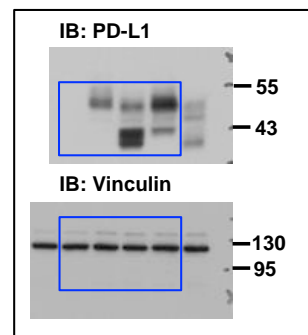

Extended Data Fig. 4j

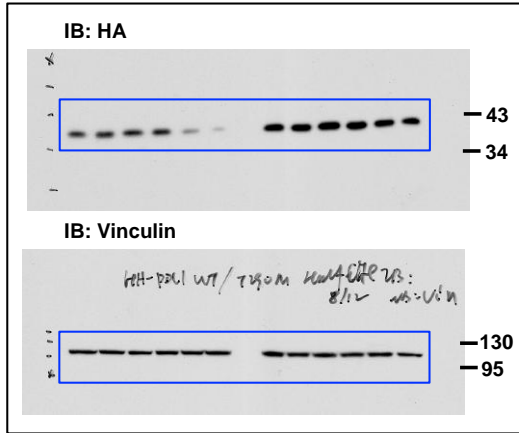

Extended Data Fig. 4k

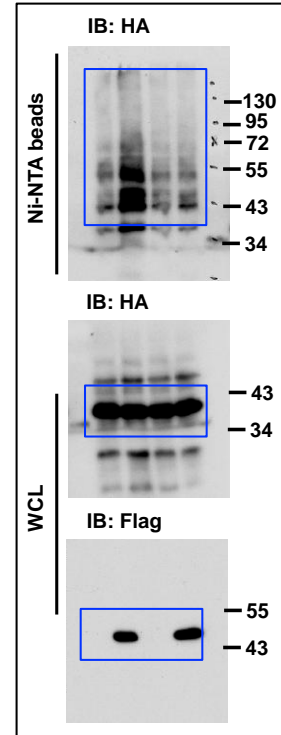

Extended Data Fig. 4l

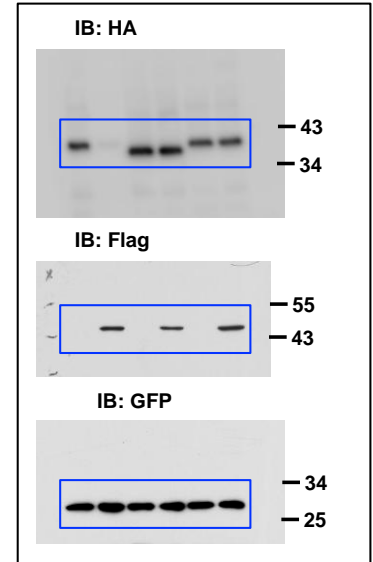

Extended Data Fig. 5a Extended Data Fig. 5b

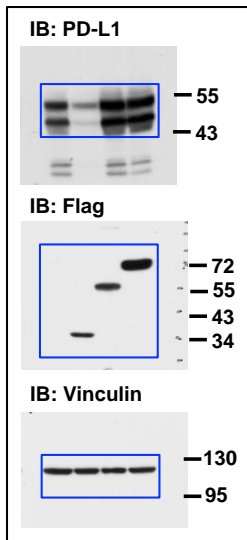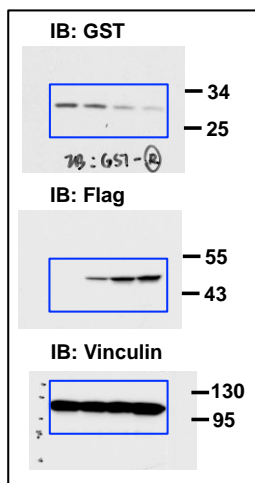

Extended Data Fig. 5f

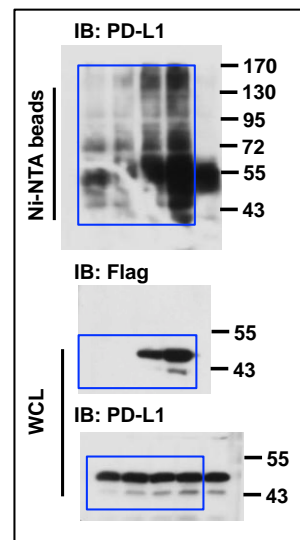

Extended Data Fig. 5d

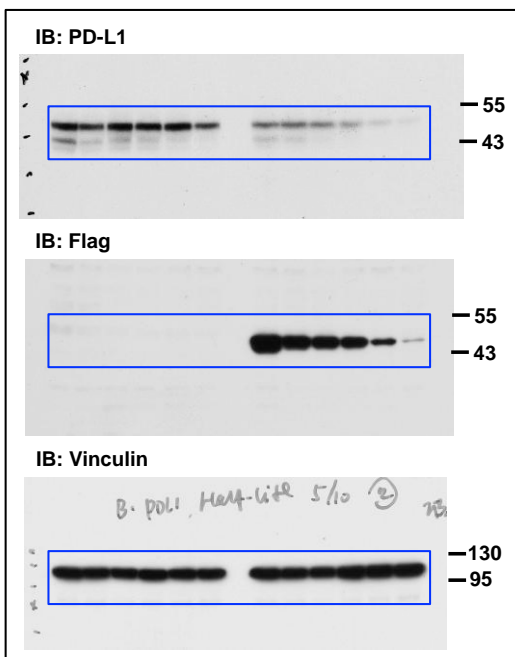

Extended Data Fig. 5c

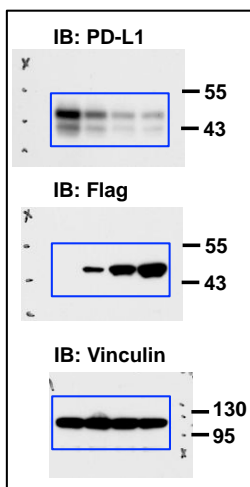

Extended Data Fig. 5h

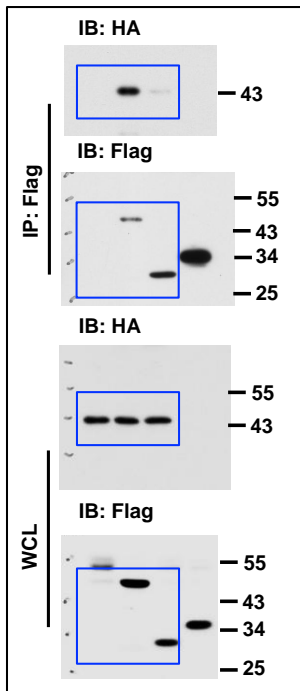

Extended Data Fig. 5i

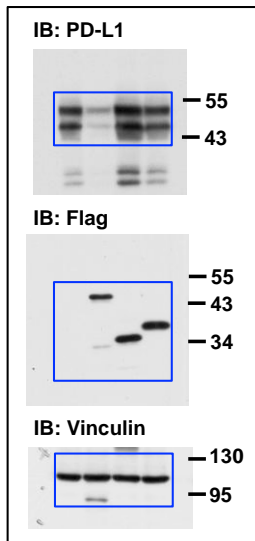

Extended Data Fig. 5k

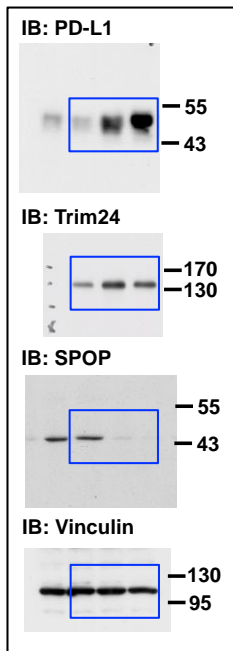

Extended Data Fig. 5l

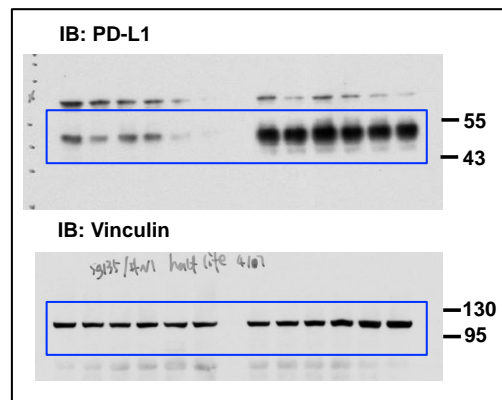

Extended Data Fig. 5n

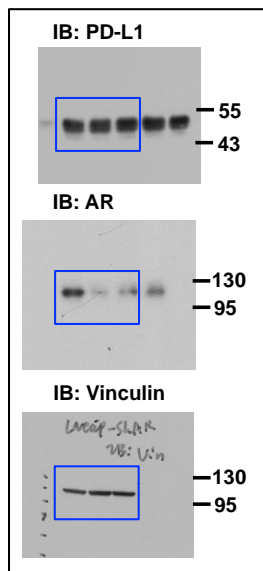

Extended Data Fig. 5o

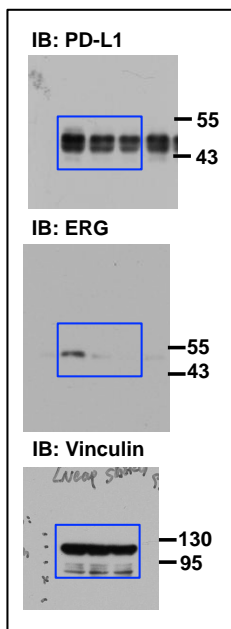

Extended Data Fig. 5p

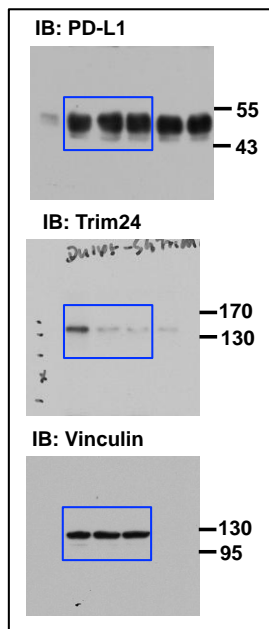

Extended Data Fig. 5q

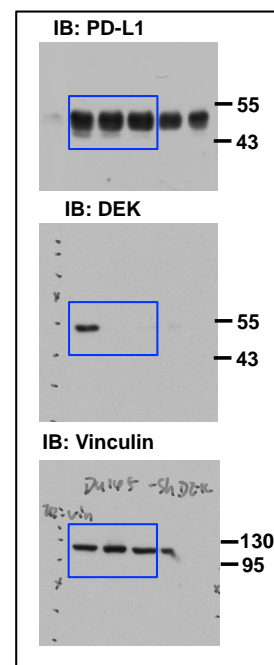

Extended Data Fig. 5r

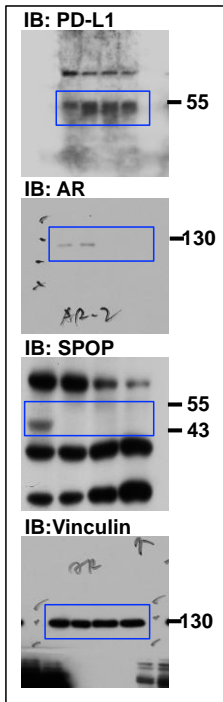

Extended Data Fig. 5s

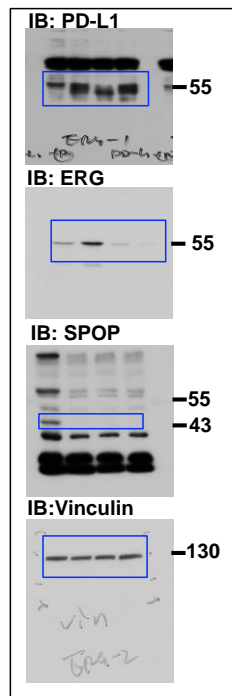

Extended Data Fig. 5t

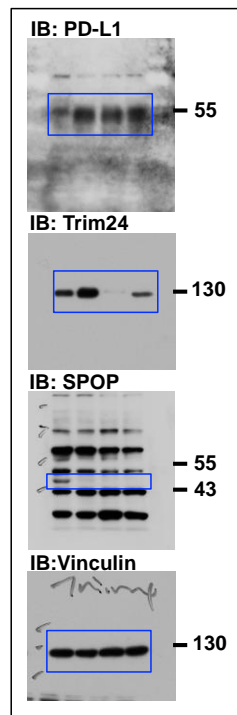

Extended Data Fig. 5u

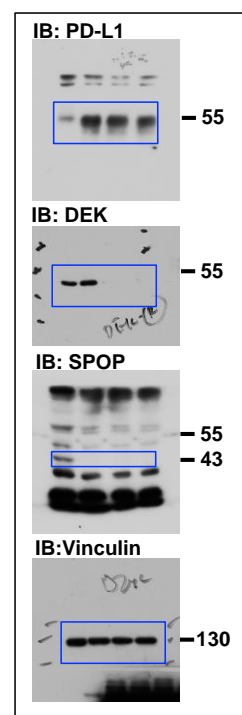

Extended Data Fig. 6c

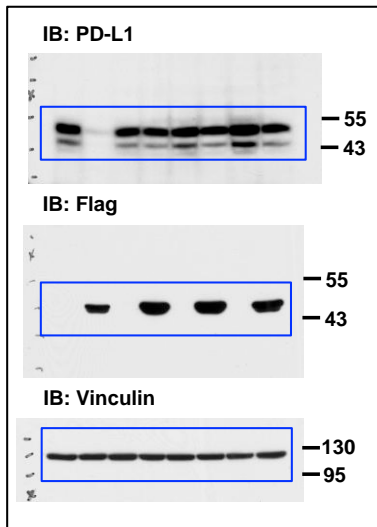

Extended Data Fig. 6f

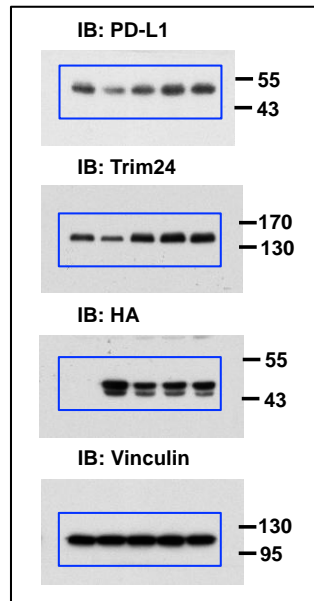

Extended Data Fig. 7a

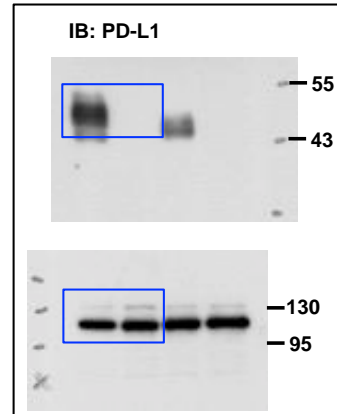

Extended Data Fig. 7e

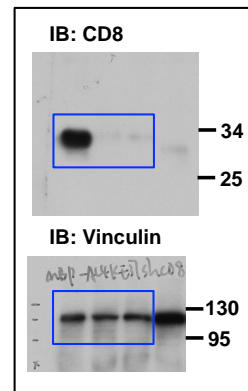

Extended Data Fig. 7f

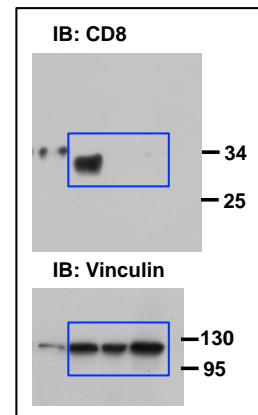

Extended Data Fig. 8a

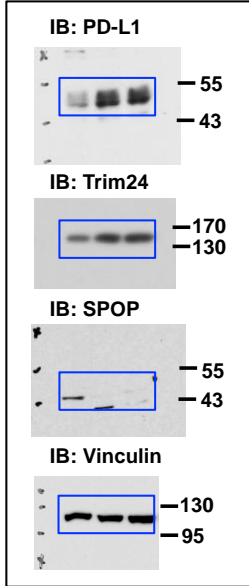

Extended Data Fig. 8b

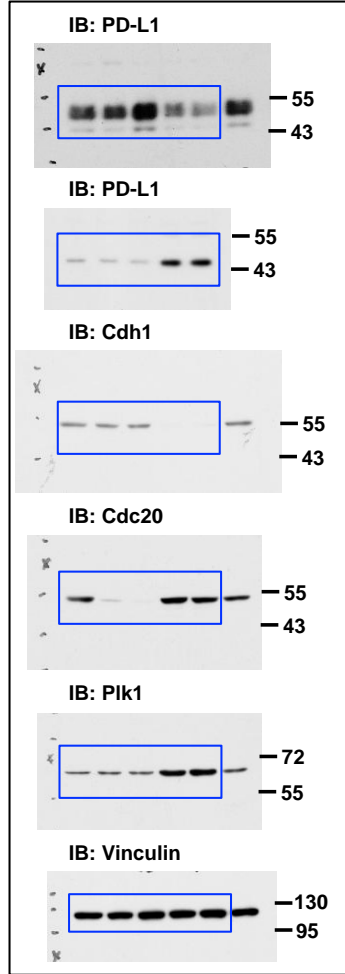

Extended Data Fig. 8c

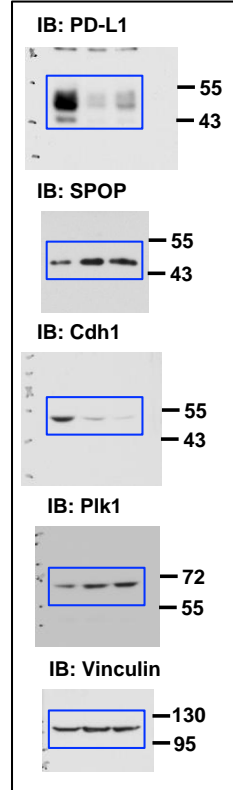

Extended Data Fig. 8d

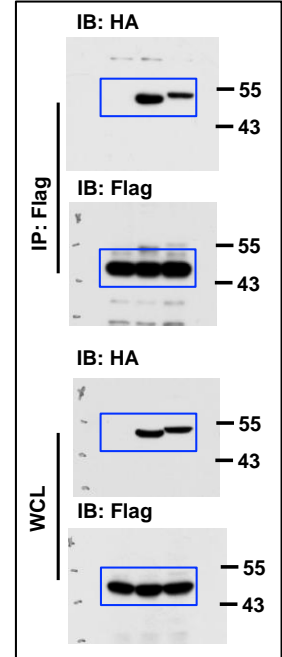

Extended Data Fig. 8e

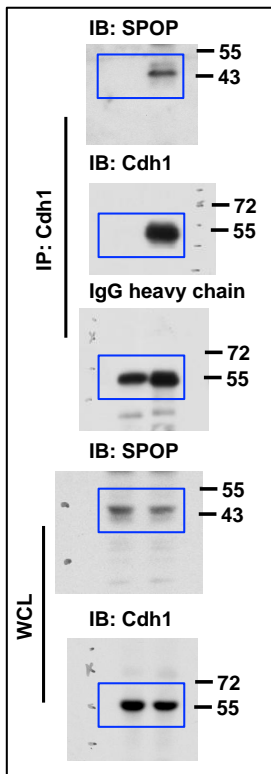

Extended Data Fig. 8g

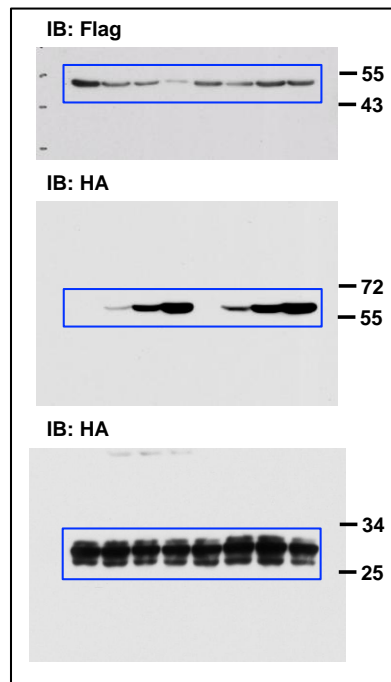

Extended Data Fig. 8h

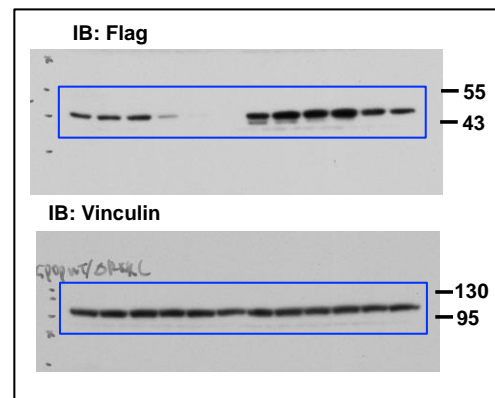



Extended Data Fig. 9b

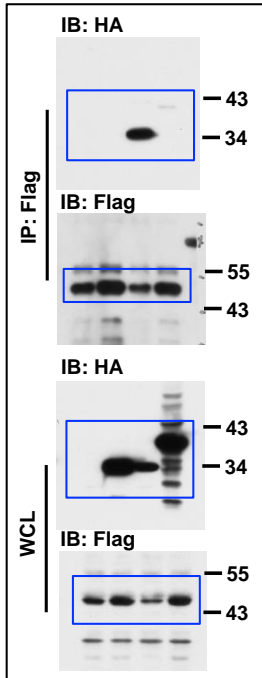

Extended Data Fig. 9c

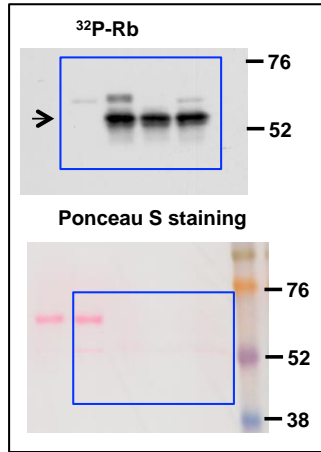

Extended Data Fig. 9d

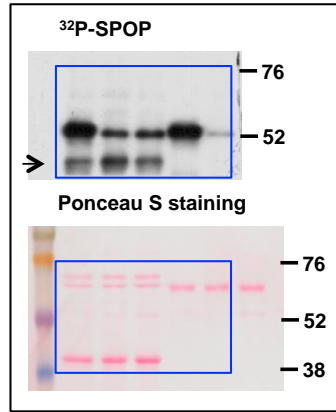

Extended Data Fig. 9e

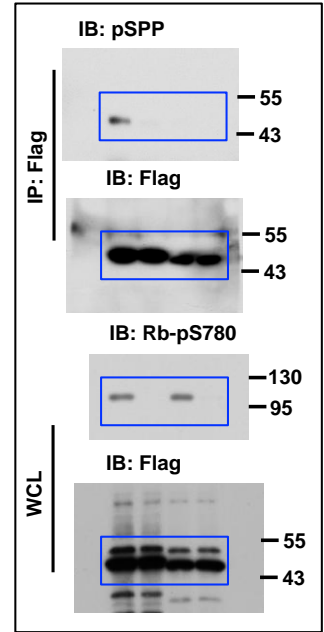

Extended Data Fig. 9g

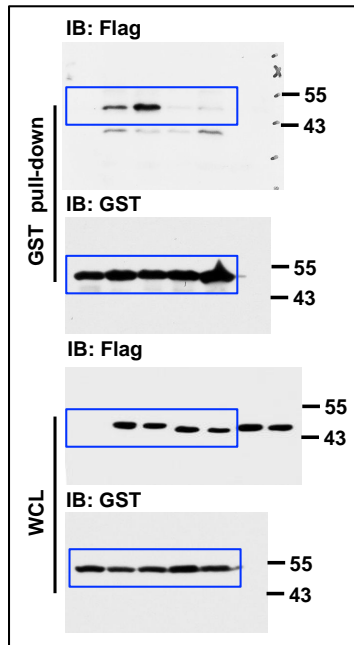

Extended Data Fig. 9h

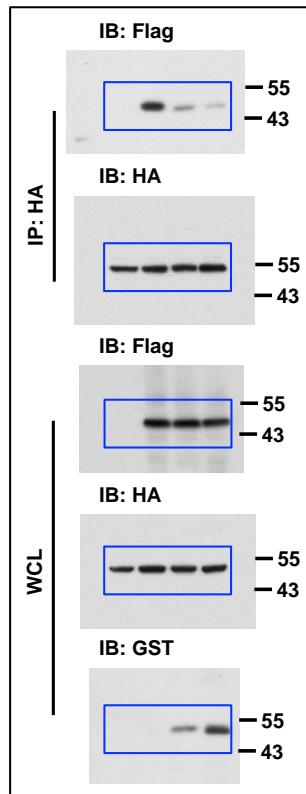

Extended Data Fig. 9f

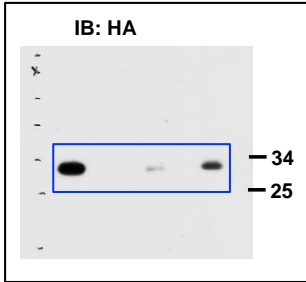

Extended Data Fig. 9j

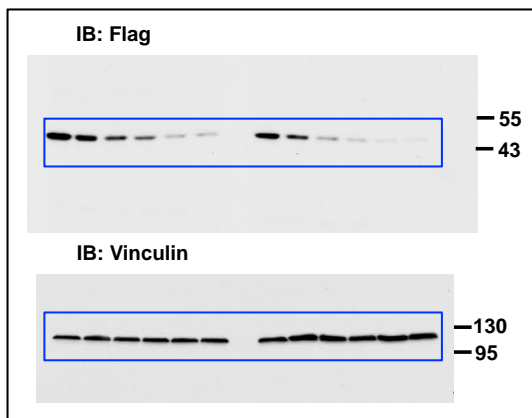

Extended Data Fig. 9i

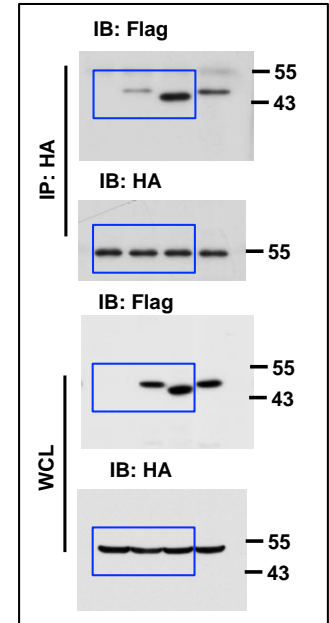

Extended Data Fig. 9i

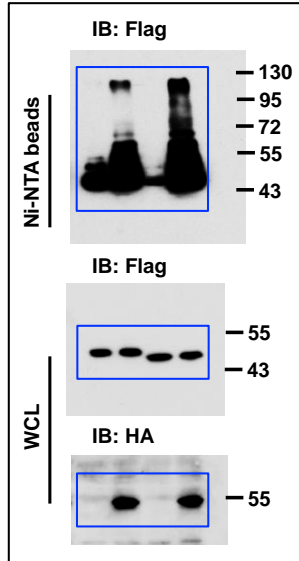

Extended Data Fig. 9m

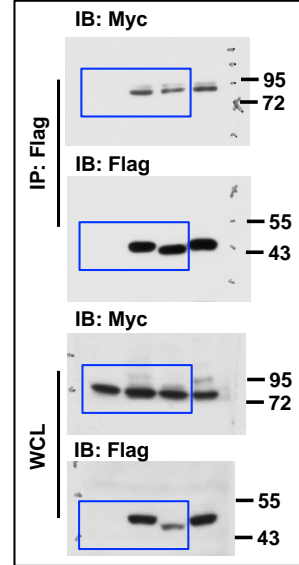

Extended Data Fig. 9n

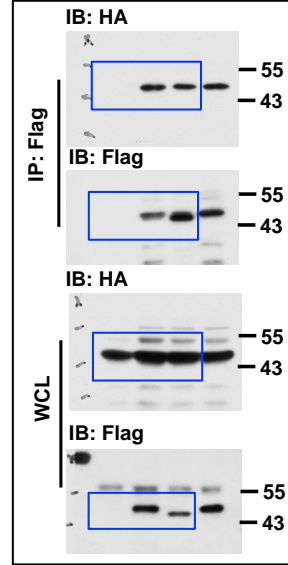

Extended Data Fig. 9o

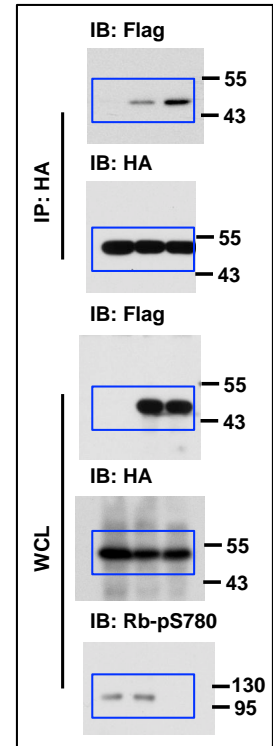

Extended Data Fig. 9p

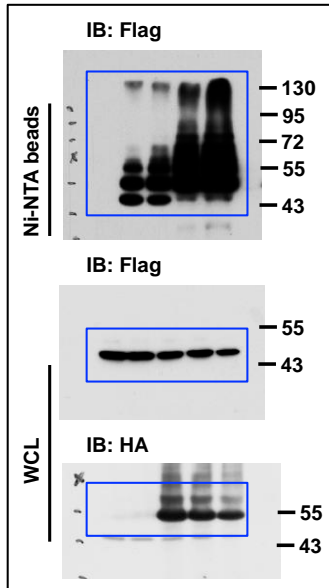

Extended Data Fig. 9q

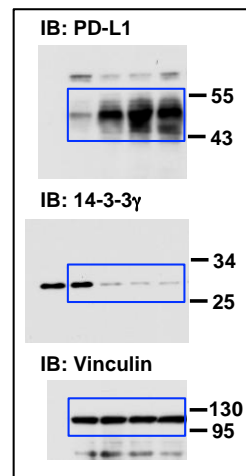

Extended Data Fig. 9t

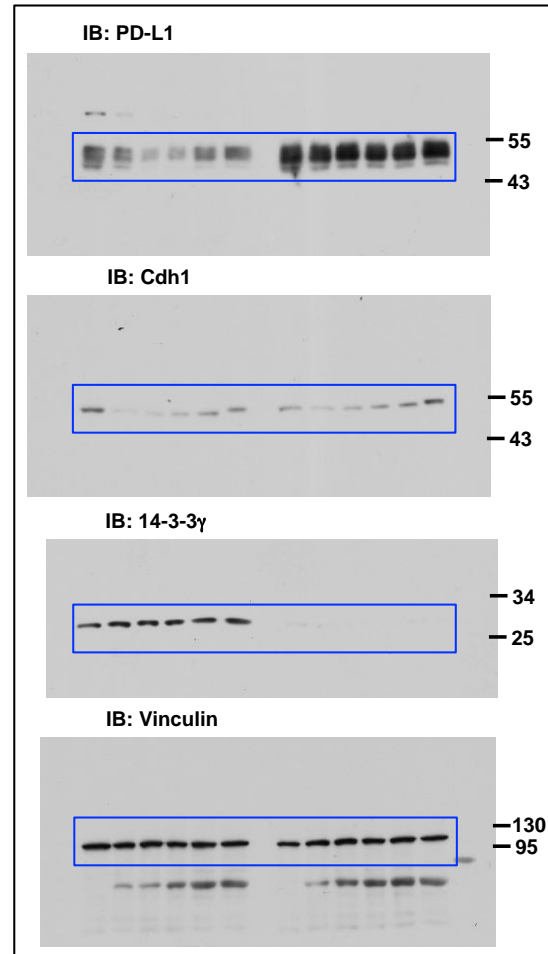

Extended Data Fig. 9r

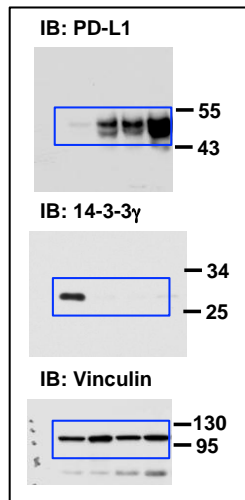

Extended Data Fig. 9s

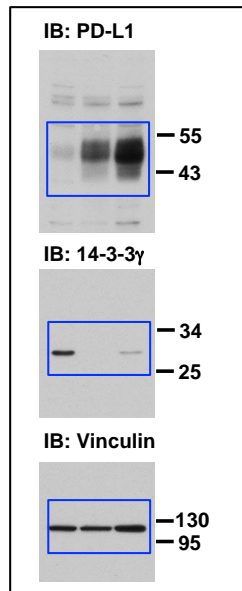

Supplement: NIHMS919072-supplement-1.pdf [file NIHMS919072-supplement-1.pdf]
