# Supplementary material
Source: PubMed Central journal article supplement (PMC5754234)
Supplement: NIHMS919072-supplement-2.pdf [file NIHMS919072-supplement-2.pdf]

## Supplementary figures to exemplify the gating strategy

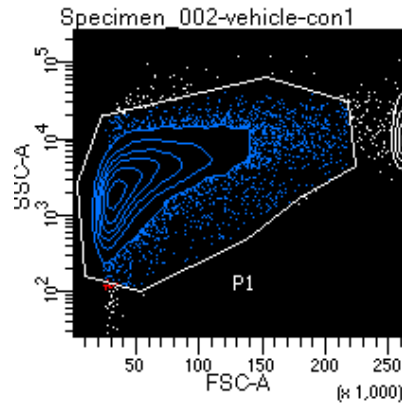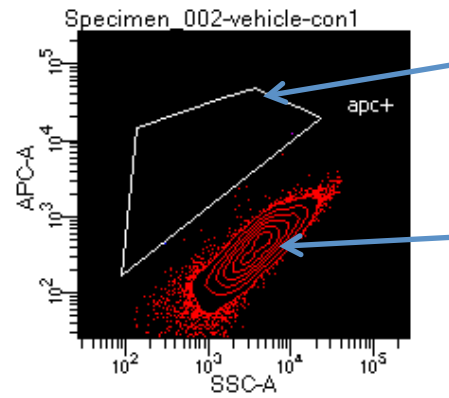

Positive

APC Rat IgG2b,  $\kappa$  Isotype Ctrl

Negative

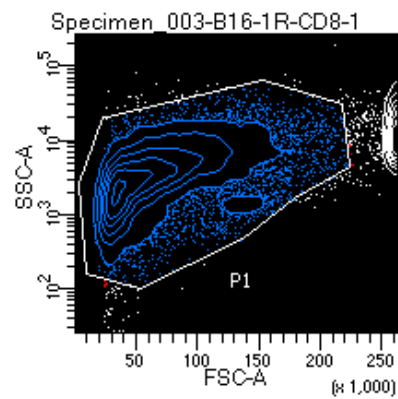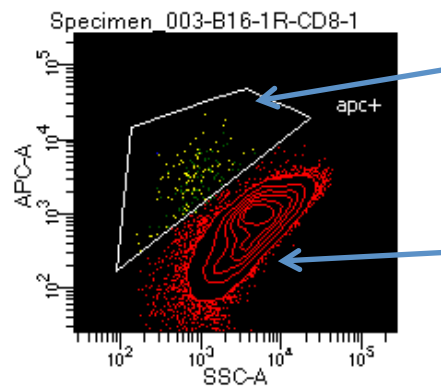

Positive

APC anti-mouse CD3 Antibody

Negative

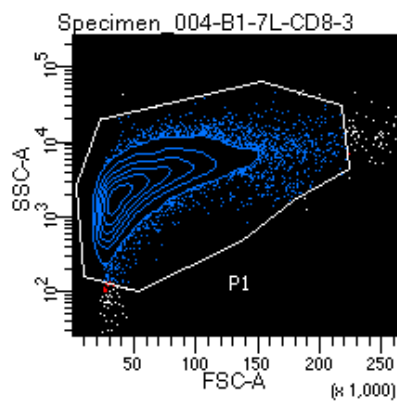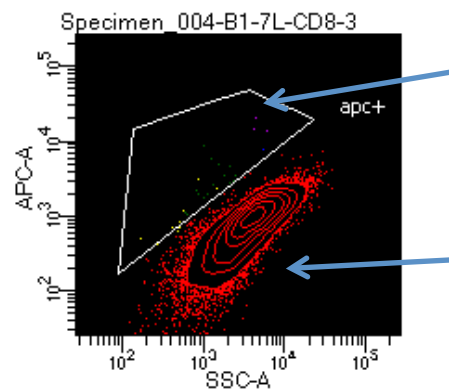

Positive

APC anti-mouse CD3 Antibody

Negative
